# Supplementary material for: GC Insights: Breaking the silos – leveraging natural language processing (NLP) to encourage interdisciplinary interaction at the European Geosciences Union (EGU)
Source: Copernicus journal article supplement (doi:10.5194/gc-8-191-2025), 2025-07-17
Supplement: Supplementary file 1 [file gc-8-191-2025-supplement.pdf]

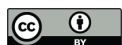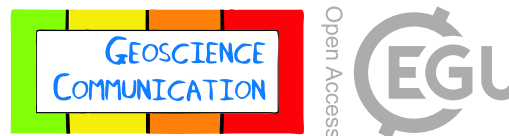

## *Supplement of*

# **GC Insights: Breaking the silos – leveraging natural language processing (NLP) to encourage interdisciplinary interaction at the European Geosciences Union (EGU)**

**Jan Sodoge et al.**

*Correspondence to:* Jan Sodoge ([jan.sodoge@ufz.de](mailto:jan.sodoge@ufz.de))

The copyright of individual parts of the supplement might differ from the article licence.

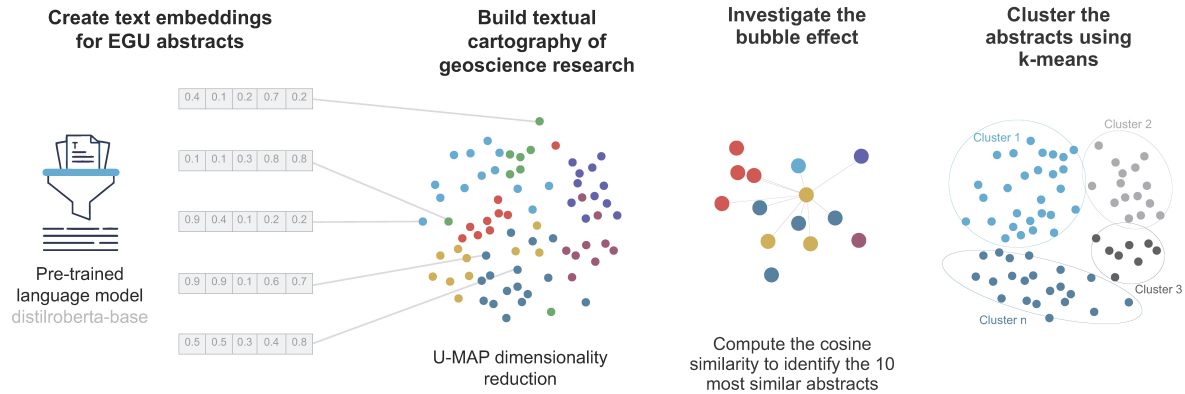

Fig. S1: Research approach which consists of 5 steps, including: (1) collecting abstracts from EGU, (2) computing similarities between abstracts, (3) visualizing the abstracts in a 2-dimensional space, (4) running a simulation to estimate the hypothesized filter effect, and (5) comparing the coherence of divisions created through clustering to the existing division structures.

Find your abstract at #EGU24

Hello there,

Feeling FOMO (fear of missing out) about missing out on relevant presentations at EGU? Do not worry, we have got your back. Our web app simplifies the hunt for conference contributions similar to yours or any other.

Here is how it works:

1. Start by typing and selecting keywords included the title of your own abstract at EGU.
2. Instantly, you will get a table of abstracts closely matching your selection.
3. You will see a similarity score in the left column of the table, with the most similar abstracts sorted at the top.

We calculate similarity using advanced natural language processing techniques. In simple terms, we create digital fingerprints of each abstract based on its content and compare them to your selected one. The underlying technique is called text embeddings. If you are curious you can read more about it [here](#) and [here](#).

Search by title:

Application of a fault identification and fault sealing evaluation method in production and development stage in 2B area of Bohai Bay Basin

Number of Entries to Show (max: 200):

20

| Rank | Similarity score | Abstract                                                                                                                                                                                                                                                                                                                                                                                                                                               | Division  | EGU LINK |
|------|------------------|--------------------------------------------------------------------------------------------------------------------------------------------------------------------------------------------------------------------------------------------------------------------------------------------------------------------------------------------------------------------------------------------------------------------------------------------------------|-----------|----------|
| 1    | 1.000000         | Chang, C. and Zhang, X.: Application of a fault identification and fault sealing evaluation method in production and development stage in 2B area of Bohai Bay Basin, EGU General Assembly 2024, Vienna, Austria, 14-19 Apr 2024, EGU24-1, <a href="https://doi.org/10.5194/egusphere-egu24-1">https://doi.org/10.5194/egusphere-egu24-1</a> , 2024.                                                                                                   | EFERE     | EGU LINK |
| 2    | 0.993855         | Vico, G., Taccaro, R. C., Maresio, F. E., Tiberti, M. M., and Batti, R.: Best practices for using and reporting subsurface geological/geophysical data in defining and documenting seismogenic faults, EGU General Assembly 2024, Vienna, Austria, 14-19 Apr 2024, EGU24-8486, <a href="https://doi.org/10.5194/egusphere-egu24-8486">https://doi.org/10.5194/egusphere-egu24-8486</a> , 2024.                                                         | ESSUSP    | EGU LINK |
| 3    | 0.991129         | Affonso, R., Elsworth, D., and Marone, C.: Fault drainage rate and frictional stability in response to shearing rate steps in natural gouge, EGU General Assembly 2024, Vienna, Austria, 14-19 Apr 2024, EGU24-0384, <a href="https://doi.org/10.5194/egusphere-egu24-0384">https://doi.org/10.5194/egusphere-egu24-0384</a> , 2024.                                                                                                                   | EMRP/EMRP | EGU LINK |
| 4    | 0.979159         | Avalos, S., Comella, C., Valle, G., Pizzi, G., Spagnuolo, E., and Cecce, M.: Fault core structure effects fault slip during fluid injection: Insights from laboratory friction experiments, EGU General Assembly 2024, Vienna, Austria, 14-19 Apr 2024, EGU24-8226, <a href="https://doi.org/10.5194/egusphere-egu24-8226">https://doi.org/10.5194/egusphere-egu24-8226</a> , 2024.                                                                    | EFERE     | EGU LINK |
| 5    | 0.970864         | Zhang, X. and Jin, Q.: The influence of faults on the development of carbonate sand reservoir in main area of lake oilfield and its significance in petroleum geology, EGU General Assembly 2024, Vienna, Austria, 14-19 Apr 2024, EGU24-67, <a href="https://doi.org/10.5194/egusphere-egu24-67">https://doi.org/10.5194/egusphere-egu24-67</a> , 2024.                                                                                               | QAGM      | EGU LINK |
| 6    | 0.968667         | Milodon, Z., Andrews, B., Rodriguez Picada, C., and Dietrich, M.: Insights into fault behaviour and seismic hazard from studying active and inactive faults over a range of timescales, EGU General Assembly 2024, Vienna, Austria, 14-19 Apr 2024, EGU24-17839, <a href="https://doi.org/10.5194/egusphere-egu24-17839">https://doi.org/10.5194/egusphere-egu24-17839</a> , 2024.                                                                     | TSTS      | EGU LINK |
| 7    | 0.966984         | Rigione, N., Mecklenburgh, J., and Rutter, E.: Frictional Response of Clay-rich Sandstone to Pore-Pressure Oscillation Throughout Interseismic Periods, EGU General Assembly 2024, Vienna, Austria, 14-19 Apr 2024, EGU24-18103, <a href="https://doi.org/10.5194/egusphere-egu24-18103">https://doi.org/10.5194/egusphere-egu24-18103</a> , 2024.                                                                                                     | EMRP/EMRP | EGU LINK |
| 8    | 0.966148         | Baton, D., Donnell-Gibson, Z., Hosseini, N., Zorabadi, D., and Clarkson, C.: Relationship between sealing faults, pressure domains and fluid-induced seismicity, EGU General Assembly 2024, Vienna, Austria, 14-19 Apr 2024, EGU24-12966, <a href="https://doi.org/10.5194/egusphere-egu24-12966">https://doi.org/10.5194/egusphere-egu24-12966</a> , 2024.                                                                                            | EFERE     | EGU LINK |
| 9    | 0.965702         | Yang, X., Tao, W., Lu, R., and Zhang, W.: Three-Dimensional Fault Slip Risk Analysis in a Shale Gas Development Area: A Case Study of the Lushan Shale Gas Field, Sichuan Basin, China, EGU General Assembly 2024, Vienna, Austria, 14-19 Apr 2024, EGU24-10294, <a href="https://doi.org/10.5194/egusphere-egu24-10294">https://doi.org/10.5194/egusphere-egu24-10294</a> , 2024.                                                                     | EFERE     | EGU LINK |
| 10   | 0.9648791        | Köster, G., Çiftçi, G., Güçlü, S., Okay, G., Güçlü, S., Hasoğlu, A., Güçlü, T., Demirezen, Z., and Çetinköylü, M.: Revealing the continuity of offshore faults in the Sefethisar (Izmir) Geothermal Area by modeling with Marine Seismic and Field Geology, EGU General Assembly 2024, Vienna, Austria, 14-19 Apr 2024, EGU24-15148, <a href="https://doi.org/10.5194/egusphere-egu24-15148">https://doi.org/10.5194/egusphere-egu24-15148</a> , 2024. | ESSUSP    | EGU LINK |
| 11   | 0.962084         | Vico, G.: High-resolution multidisciplinary studies of fault zone architecture: Insights into deformation histories, fault mechanics, fluid circulation, weathering and... EGU General Assembly 2024, Vienna, Austria, 14-19 Apr 2024, EGU24-4876, <a href="https://doi.org/10.5194/egusphere-egu24-4876">https://doi.org/10.5194/egusphere-egu24-4876</a> , 2024.                                                                                     | TSTS      | EGU LINK |

Fig. S2: Screenshot of a web application for EGU GA participants to explore relevant abstracts. Participants can search for a particular submission and receive a list of the most similar abstracts. Additionally, an interactive map can be displayed similar to Fig. 1A.
